# Supplementary material for: Ginsenoside PPD’s Antitumor Effect via Down-Regulation of mTOR Revealed by Super-Resolution Imaging
Source: PubMed Central journal article supplement (PMC6155369; doi:10.3390/molecules22030486), 2017-03-19
Supplement: molecules-22-00486-s001.pdf [file molecules-22-00486-s001.pdf]

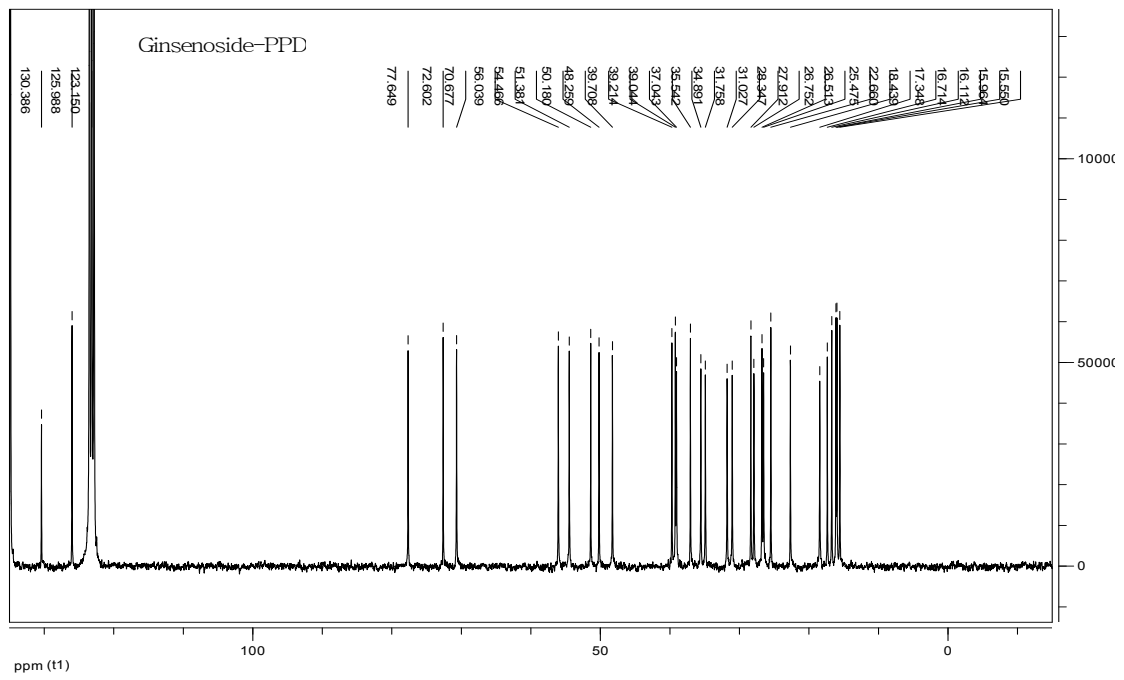

Figure 3.  $^{13}\text{C}$  NMR of PPD.
